# Errata

## Authors' errors

Ionic channels and hormone release from peptidergic nerve terminals

By JOSÉ R. LEMOS AND JEAN J. NORDMANN

*J. exp. Biol.* **124**, 53–72.

Page 69, Fig. 12: scale bar should read 1 pA not 10 pA.

Page 69, line 2: 280 pS should read 28 pS.

The effects of sensory manipulation upon interlimb coordination during fast walking in the cockroach

By TWEN POH TANG AND DAVID L. MACMILLAN

*J. exp. Biol.* **125**, 107–117.

Fig. 1 on page 109 of this paper is described in the text as showing typical sequences of walking in an untethered animal. The figure actually illustrates examples of transitional gait perturbations that occur only rarely. An example of the typical pattern is shown in the figure below. In this system, as in others studied, the concentrating effect of load is a much finer adjustment than is suggested by the erroneously substituted example.

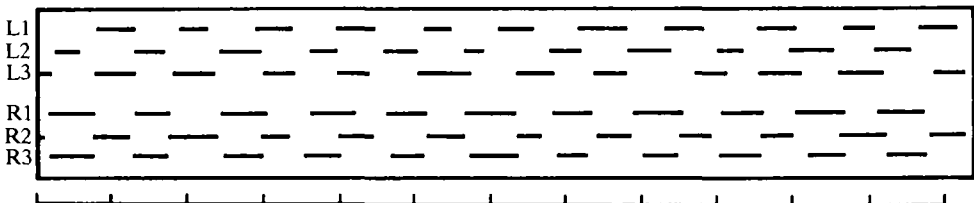

Fig. 1. Stepping pattern from a sequence of untethered walking in a straight line with a stepping frequency of approximately 10 Hz. Note that the powerstroke or stance phase is represented here by a line and the returnstroke by a space. Legs are labelled L1–L3 and R1–R3 from front to rear on the left and right side, respectively. Time marker, 100-ms intervals.

Myocardial intracellular pH in a perfused rainbow trout heart during extracellular acidosis in the presence and absence of adrenaline

By A. P. FARRELL AND C. L. MILLIGAN

*J. exp. Biol.* **125**, 347–359.

Page 353, Fig. 2: stippled bars represent  $pH_i$  values and open bars represent  $pH_e$  values.
